# Supplementary material
Source: PubMed Central journal article supplement (PMC3583505)
Supplement: supp_112.201400_JPET201400_Supplemental_Figure_2.pdf [file supp_112.201400_JPET201400_Supplemental_Figure_2.pdf]

# Pharmacological Inhibition of Mitochondrial Carbonic Anhydrases Protects Mouse Cerebral Pericytes from High Glucose-Induced Oxidative Stress and Apoptosis

Gul N. Shah, Tulin O. Price, William A. Banks, Yoichi Morofuji, Andrej Kovac, Nuran Ercal, Christine M. Sorenson, Eui S. Shin, and Nader Sheibani

Journal of Pharmacology and Experimental Therapeutics  
JPET #201400

## Supplemental Figure 2

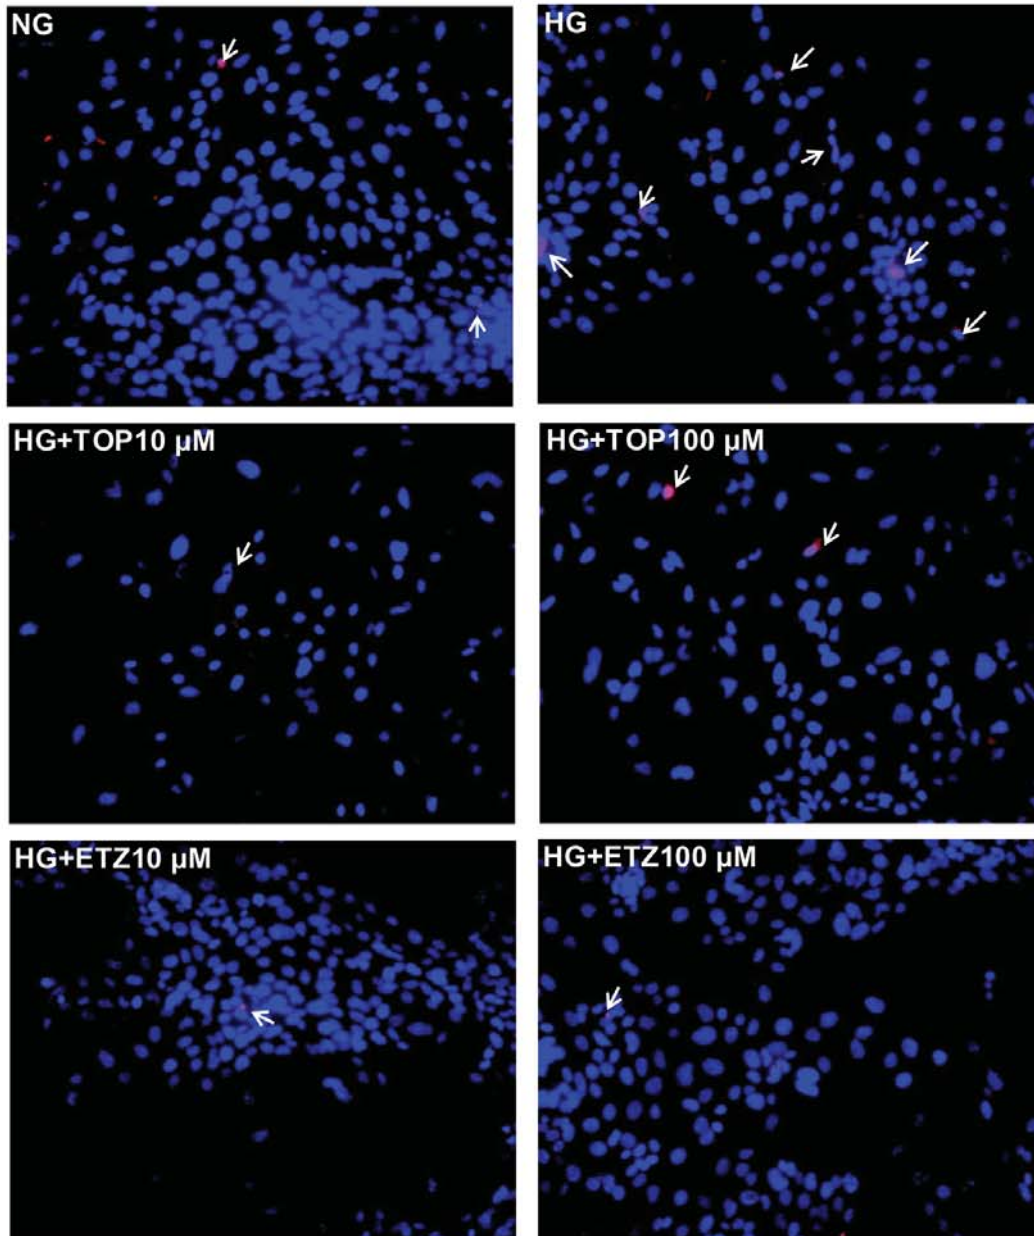

### Legend:

TUNEL images showing the effect of inhibition of mCA on high glucose-induced apoptosis in immortalized cerebral pericytes (IPC). The IPC were cultured in normal glucose (NG, 5.7 mM), high glucose (HG, 40.7 mM), or HG with either ethoxzolamide (ETZ) or topiramate (TOP) for 5 days. Apoptotic cells were discerned by TUNEL staining, nuclei were counterstained with Hoechst. High glucose induced apoptosis was attenuated by both ETZ and TOP at both concentrations (10,100  $\mu\text{M}$ ).
